# Supplementary material for: Structural, vibrational and electronic characterization of 1-benzyl-3-furoyl-1-phenylthiourea: an experimental and theoretical study
Source: Royal Society of Chemistry journal article supplement (doi:10.1039/c5nj01210d), 2015-01-01
Supplement: c5nj01210d1.pdf [file c5nj01210d1.pdf]

Supplementary material for the article “**STRUCTURAL, VIBRATIONAL AND ELECTRONIC CHARACTERIZATION OF 1-BENZYL-3-FUROYL-1-PHENYLTHIOUREA: AN EXPERIMENTAL AND THEORETICAL STUDY**” by María Eliana DefonsiLestard<sup>1,\*,+</sup>, Diego M. Gil<sup>1</sup>, Osvaldo Estévez-Hernández<sup>2,3</sup>, Mauricio F. Erben<sup>4</sup> and J. Duque<sup>2,3</sup>

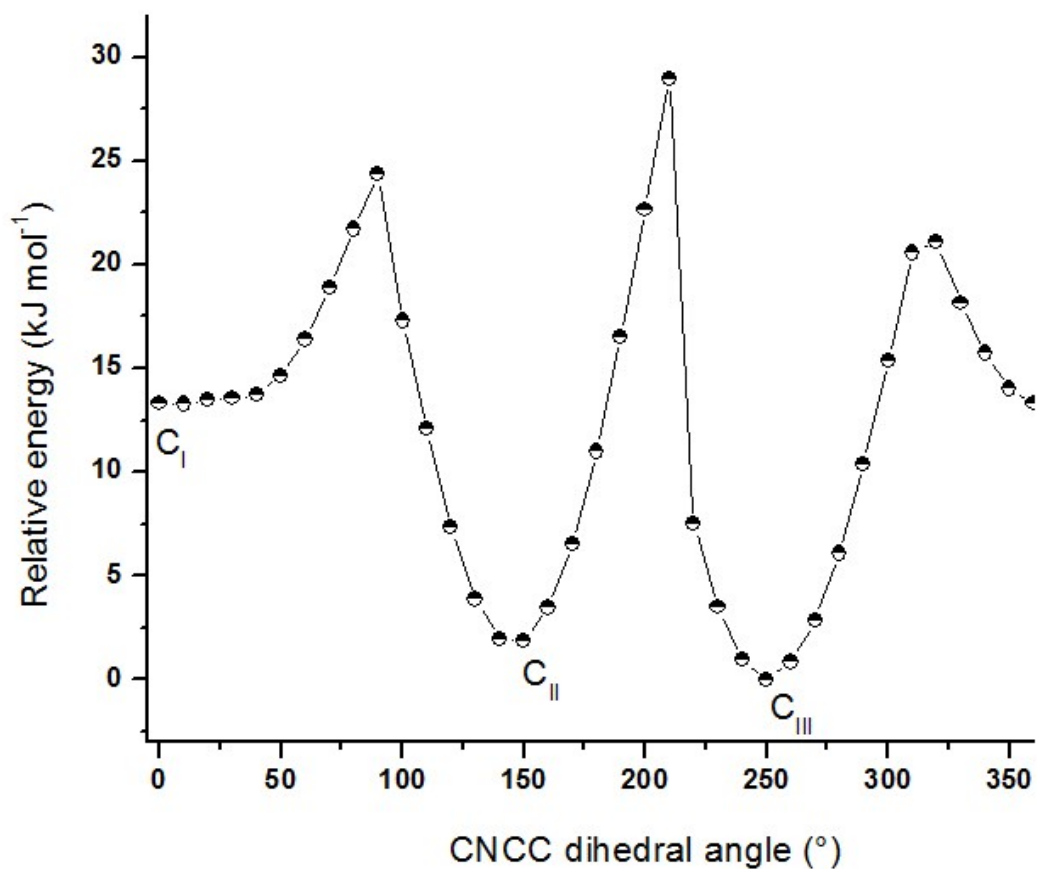

**Figure S1:** B3LYP/6-31G(d,p)-calculated potential energy profile for the internal rotation of N(20)-C(2) bond.

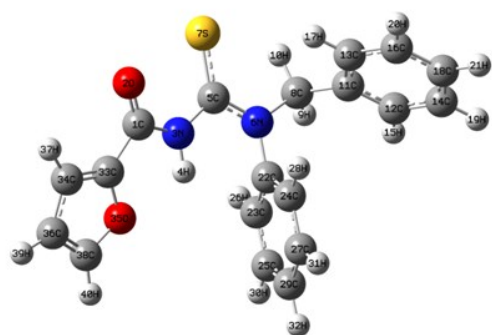

Conformer I (13.29)

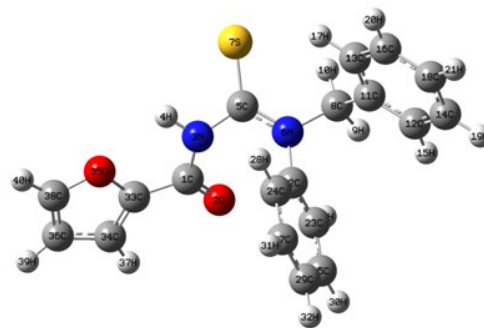

Conformer II (1.875)

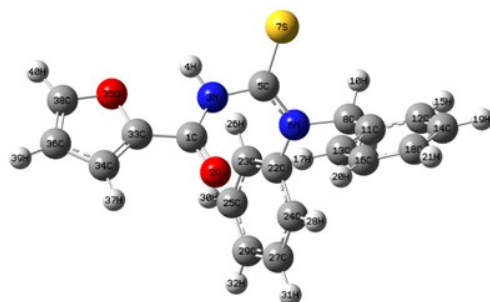

Conformer III (0.000)

**Figure S2:** The three low energy stable conformers of 1-benzyl-3-furoyl-1-phenylthiourea. Relative energy values (in  $\text{kJ mol}^{-1}$ ) are given in parenthesis.

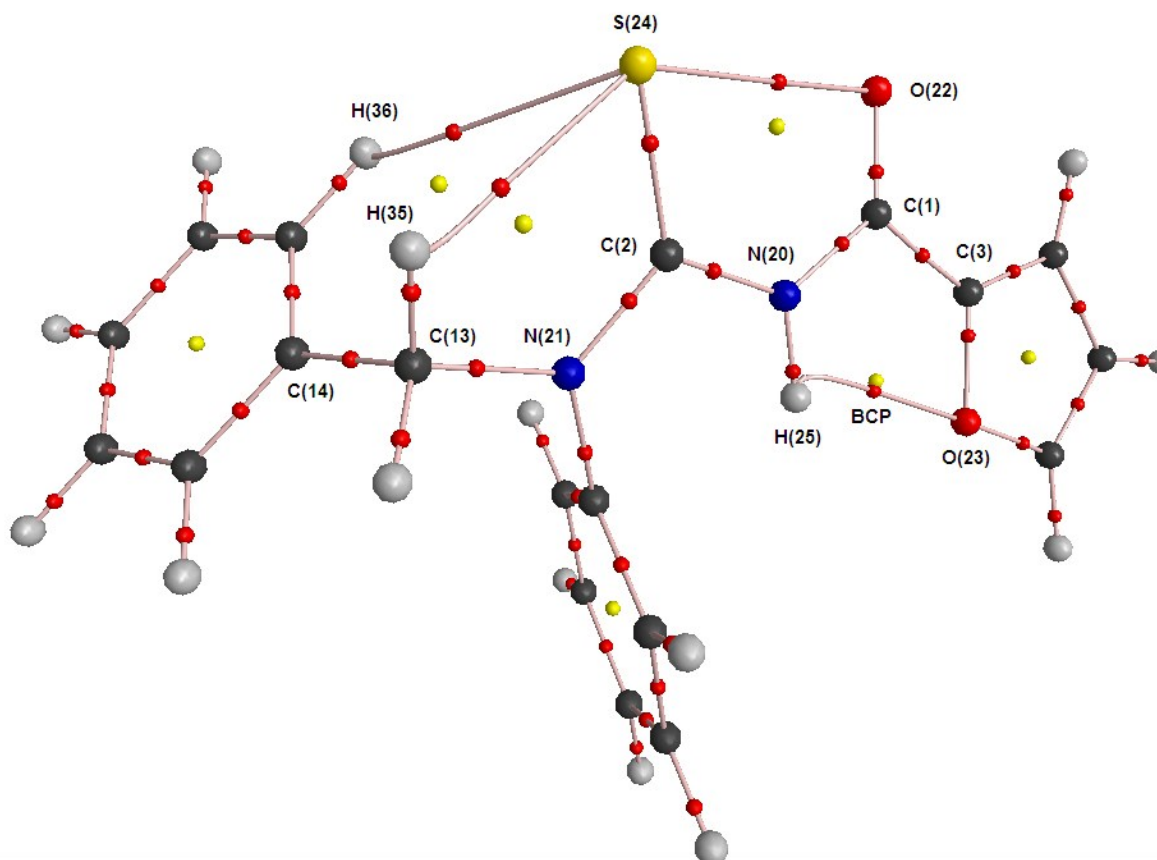

**Figure S3:** Molecular graph of 1-benzyl-3-furoyl-1-phenylthiourea calculated at B3LYP/6-311++G(d,p) level using AIM program: Bond critical points (small red spheres), ring critical points (small yellow spheres) and bond path (pink lines).

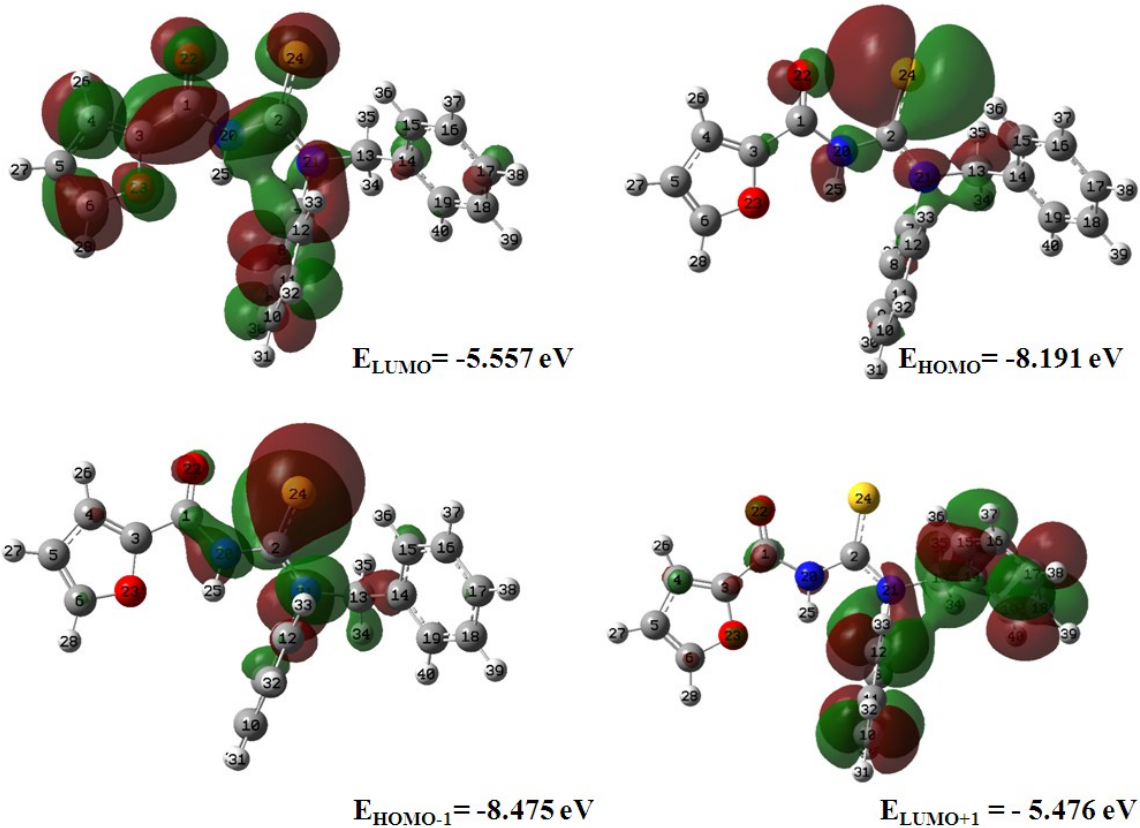

**Figure S4:** Frontier molecular orbitals HOMO, LUMO, HOMO-1, LUMO+1 for 1-benzyl-3-furoyl-1-phenylthiourea.

**Table S1:** Dipole moment, polarizability and first-order hyperpolarizability data for 1-benzyl-3-furoyl-1-phenylthiourea calculated at B3LYP/6-311++G(d,p) level of approximation.

| Polarizability          |                         | First-order hyperpolarizability |                         |
|-------------------------|-------------------------|---------------------------------|-------------------------|
| B3LYP/6-311++G(d,p)     |                         | B3LYP/6-311++G(d,p)             |                         |
| $\alpha_{xx}$           | 282.254                 | $\beta_{xxx}$                   | 208.651                 |
| $\alpha_{xy}$           | 16.274                  | $\beta_{xxy}$                   | -342.485                |
| $\alpha_{yy}$           | 216.844                 | $\beta_{xyy}$                   | -417.551                |
| $\alpha_{xz}$           | -8.922                  | $\beta_{yyy}$                   | 312.550                 |
| $\alpha_{yz}$           | 21.906                  | $\beta_{xxz}$                   | -160.014                |
| $\alpha_{zz}$           | 302.503                 | $\beta_{xvz}$                   | -112.348                |
| $\alpha_{mean(a.u.)}$   | 267.200                 | $\beta_{yyz}$                   | -358.586                |
| $\alpha_{mean(e.s.u.)}$ | $3.959 \times 10^{-23}$ | $\beta_{xzz}$                   | -352.773                |
| $\mu_x$                 | 3.0109                  | $\beta_{yzz}$                   | 89.325                  |
| $\mu_y$                 | 0.1451                  | $\beta_{zzz}$                   | 603.382                 |
| $\mu_z$                 | -0.609                  | $\beta_{total(a.u.)}$           | 551.546                 |
| $\mu_{total}$           | 3.075                   | $\beta_{total(e.s.u.)}$         | $4.765 \times 10^{-30}$ |
